# Supplementary material for: Ang–Tie Angiogenic Pathway Is Distinctively Expressed in Benign and Malignant Adrenocortical Tumors
Source: MDPI journal article supplement (doi:10.3390/ijms23105579), 2022-05-17
Supplement: s1 [file s1]

**Ang-Tie angiogenic pathway is distinctively expressed in benign and malignant adrenocortical tumors**

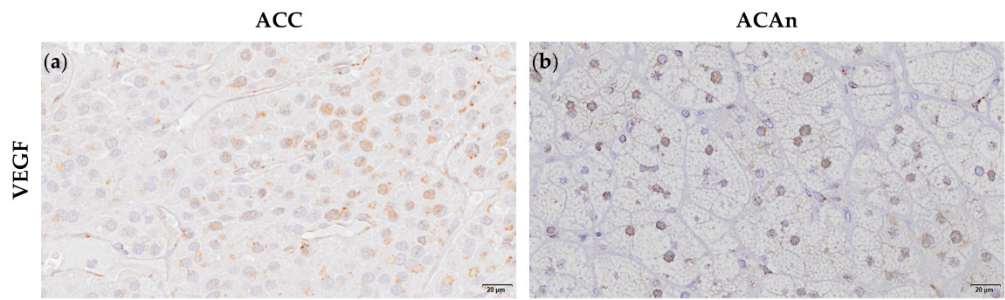

**Figure S1.** Immunohistochemistry staining of adrenocortical carcinomas (ACC) (a) and non-functioning adrenocortical adenoma (ACAn) (b) for VEGF. VEGF nuclear staining in ACC and ACAn (a, b).

**Ang-Tie angiogenic pathway is distinctively expressed in benign and malignant adrenocortical tumors**

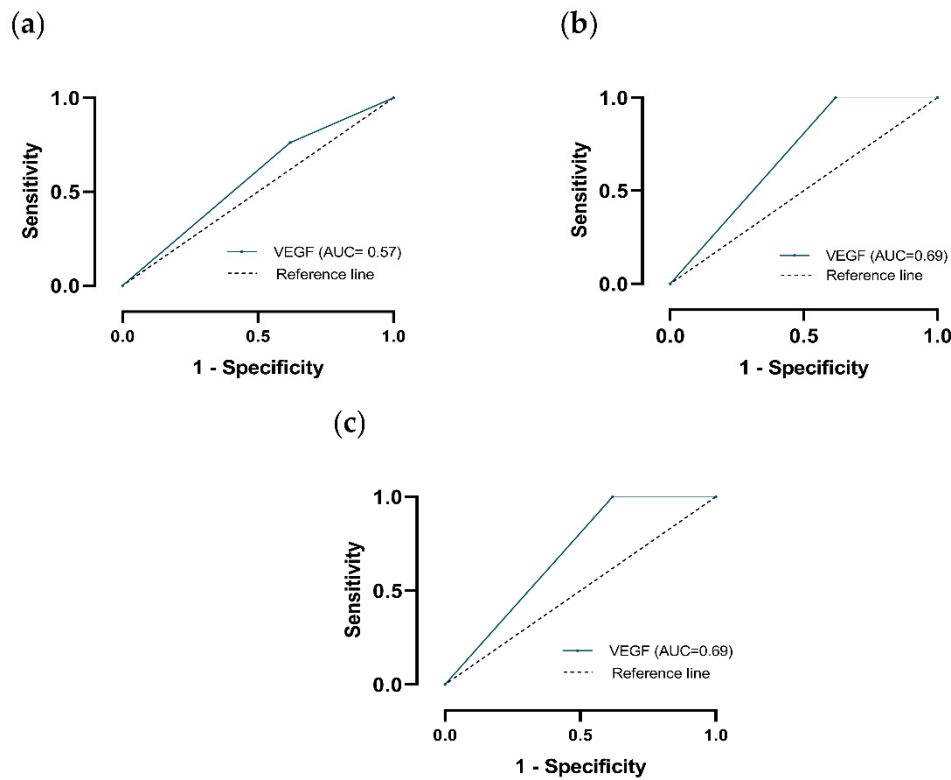

**Figure S2.** ROC curves to assess the accuracy of VEGF to distinguish between adrenocortical carcinomas (ACC) and total adrenocortical adenomas (ACAt) (a); ACC and adrenocortical adenomas with Cushing syndrome (ACAc) (b); ACC and non-functioning adrenocortical adenoma (ACAn) (c) with the respective area under the curve (AUC).

**Ang-Tie angiogenic pathway is distinctively expressed in benign and malignant adrenocortical tumors**

**Table S1.** Correlation between the angiogenic markers and patient/tumor characteristics in ACC.

| Correlation | <i>p</i> |
|-------------|----------|
|-------------|----------|

| Angiogenic marker | Patient/ Tumor characteristics | Coefficient correlation (r) |    |
|-------------------|--------------------------------|-----------------------------|----|
| CD34              | Age                            | 0.080                       | ns |
|                   | Tumor size                     | -0.138                      | ns |
|                   | Weiss score                    | 0.006                       | ns |
|                   | ENSAT score                    | 0.285                       | ns |
| VEGF-R2           | Age                            | -0.188                      | ns |
|                   | Tumor size                     | 0.136                       | ns |
|                   | Weiss score                    | 0.279                       | ns |
|                   | ENSAT score                    | 0.441                       | ns |
| Ang1              | Age                            | 0.376                       | ns |
|                   | Tumor size                     | 0.055                       | ns |
|                   | Weiss score                    | 0.128                       | ns |
|                   | ENSAT score                    | 0.043                       | ns |
| Ang2              | Age                            | -0.004                      | ns |
|                   | Tumor size                     | 0.317                       | ns |
|                   | Weiss score                    | 0.152                       | ns |
|                   | ENSAT score                    | 0.336                       | ns |
| Tie1              | Age                            | 0.096                       | ns |
|                   | Tumor size                     | 0.092                       | ns |
|                   | Weiss score                    | 0.060                       | ns |
|                   | ENSAT score                    | 0.006                       | ns |
| Tie2              | Age                            | -0.126                      | ns |
|                   | Tumor size                     | 0.202                       | ns |
|                   | Weiss score                    | -0.175                      | ns |
|                   | ENSAT score                    | -0.158                      | ns |

Ang1: Angiopoietin 1; Ang2: Angiopoietin 2; ENSAT: European Network for the Study of Adrenal Tumors; ns: non-significant; Tie1: Tyrosine kinase with immunoglobulin-like and EGF-like domain 1; Tie2: Tyrosine kinase with immunoglobulin-like and EGF-like domain 2; VEGF-R2: Vascular endothelial growth factor receptor 2.

**Ang-Tie angiogenic pathway is distinctively expressed in benign and malignant adrenocortical tumors**

**Table S2.** Correlation between the angiogenic markers and patient/tumor characteristics in ACaC.

| Correlation       |                                | Coefficient correlation (r) | p  |
|-------------------|--------------------------------|-----------------------------|----|
| Angiogenic marker | Patient/ Tumor characteristics |                             |    |
| CD34              | Age                            | -0.538                      | ns |
|                   | Tumor size                     | 0.655                       | ns |
|                   | Weiss score                    | 0.131                       | ns |
| VEGF-R2           | Age                            | 0.357                       | ns |
|                   | Tumor size                     | -0.509                      | ns |
|                   | Weiss score                    | 0.393                       | ns |
| Ang1              | Age                            | 0.429                       | ns |
|                   | Tumor size                     | 0.436                       | ns |
|                   | Weiss score                    | 0.655                       | ns |
| Ang2              | Age                            | 0.500                       | ns |
|                   | Tumor size                     | 0.127                       | ns |
|                   | Weiss score                    | 0.393                       | ns |
| Tie1              | Age                            | -0.250                      | ns |
|                   | Tumor size                     | 0.164                       | ns |

|             |             |        |    |
|-------------|-------------|--------|----|
| <b>Tie2</b> | Weiss score | -0.655 | ns |
|             | Age         | 0.143  | ns |
|             | Tumor size  | 0.291  | ns |
|             | Weiss score | 0.393  | ns |

Ang1: Angiopoietin 1; Ang2: Angiopoietin 2; ENSAT: European Network for the Study of Adrenal Tumors; ns: non-significant; Tie1: Tyrosine kinase with immunoglobulin-like and EGF-like domain 1; Tie2: Tyrosine kinase with immunoglobulin-like and EGF-like domain 2; VEGF-R2: Vascular endothelial growth factor receptor 2.

**Ang-Tie angiogenic pathway is distinctively expressed in benign and malignant adrenocortical tumors**

**Table S3.** Correlation between the angiogenic markers and patient/tumor characteristics in ACAn.

| Angiogenic marker | Correlation                    |                             | <i>p</i> |
|-------------------|--------------------------------|-----------------------------|----------|
|                   | Patient/ Tumor characteristics | Coefficient correlation (r) |          |
| <b>CD34</b>       | Age                            | 0.073                       | ns       |
|                   | Tumor size                     | -0.0471                     | ns       |
|                   | Weiss score                    | -                           |          |
| <b>VEGF-R2</b>    | Age                            | 0.093                       | ns       |
|                   | Tumor size                     | 0.311                       | ns       |
|                   | Weiss score                    | -                           |          |
| <b>Ang1</b>       | Age                            | 0.091                       | ns       |
|                   | Tumor size                     | 0.471                       | ns       |
|                   | Weiss score                    | -                           | -        |
| <b>Ang2</b>       | Age                            | 0.030                       | ns       |
|                   | Tumor size                     | 0.546                       | ns       |
|                   | Weiss score                    | -                           |          |
| <b>Tie1</b>       | Age                            | 0.358                       | ns       |
|                   | Tumor size                     | 0.101                       | ns       |
|                   | Weiss score                    | -                           |          |

Ang1: Angiopoietin 1; Ang2: Angiopoietin 2; ENSAT: European Network for the Study of Adrenal Tumors; ns: non-significant; Tie1: Tyrosine kinase with immunoglobulin-like and EGF-like domain 1; VEGF-R2: Vascular endothelial growth factor receptor 2. Correlation between expression of the angiogenic markers and the Weiss score as not performed, since the score for all ACAn was 0.

**Ang-Tie angiogenic pathway is distinctively expressed in benign and malignant adrenocortical tumors**

**Table S4.** Percentage of ACC samples with different VEGF expression localization pattern according to various parameters including ENSAT score, metastasis, capsular, venous and sinusoidal invasion.

|                          |          | Cytoplasm + Nucleus expression |       | Cytoplasm expression |
|--------------------------|----------|--------------------------------|-------|----------------------|
|                          |          |                                |       |                      |
| <b>ENSAT score</b>       | 1-2      | 50.00%                         |       | 50.00%               |
|                          | 3-4      | 50.00%                         |       | 50.00%               |
|                          | <i>p</i> |                                | >0.99 |                      |
| <b>Metastasis</b>        | Yes      | 33.33%                         |       | 16.67%               |
|                          | No       | 66.67%                         |       | 83.33%               |
|                          | <i>p</i> |                                | >0.99 |                      |
| <b>Capsular Invasion</b> | Yes      | 85.71%                         |       | 71.43%               |
|                          | No       | 14.29%                         |       | 28.57%               |
|                          | <i>p</i> |                                | >0.99 |                      |

|                                |          |        |      |        |
|--------------------------------|----------|--------|------|--------|
| <b>Venous<br/>Invasion</b>     | Yes      | 28.57% |      | 55.56% |
|                                | No       | 71.43% |      | 44.44% |
|                                | <i>p</i> |        | 0.36 |        |
| <b>Sinusoidal<br/>Invasion</b> | Yes      | 57.14% |      | 87.50% |
|                                | No       | 42.86% |      | 12.50% |
|                                | <i>p</i> |        | 0.28 |        |

ENSAT: European Network for the Study of Adrenal Tumors.
